# Supplementary material for: Circulating Non-coding RNAs as Potential Biomarkers for Ischemic Stroke:A Systematic Review
Source: Research Square preprint supplement (doi:10.21203/rs.3.rs-1244517/v1), 2022-01-18
Supplement: Supplementary file 1 [file ea3c86ed787d02c26c09b24f.docx]

# Supplementary materials

Figure S1 SROC curve for 20 sets of single miRNAs

Figure S2 SROC curve for 7 sets of combined miRNAs

Figure S3 SROC curve for 13 sets of single lncRNAs

Figure S4 SROC curve for 5 sets of combined lncRNAs


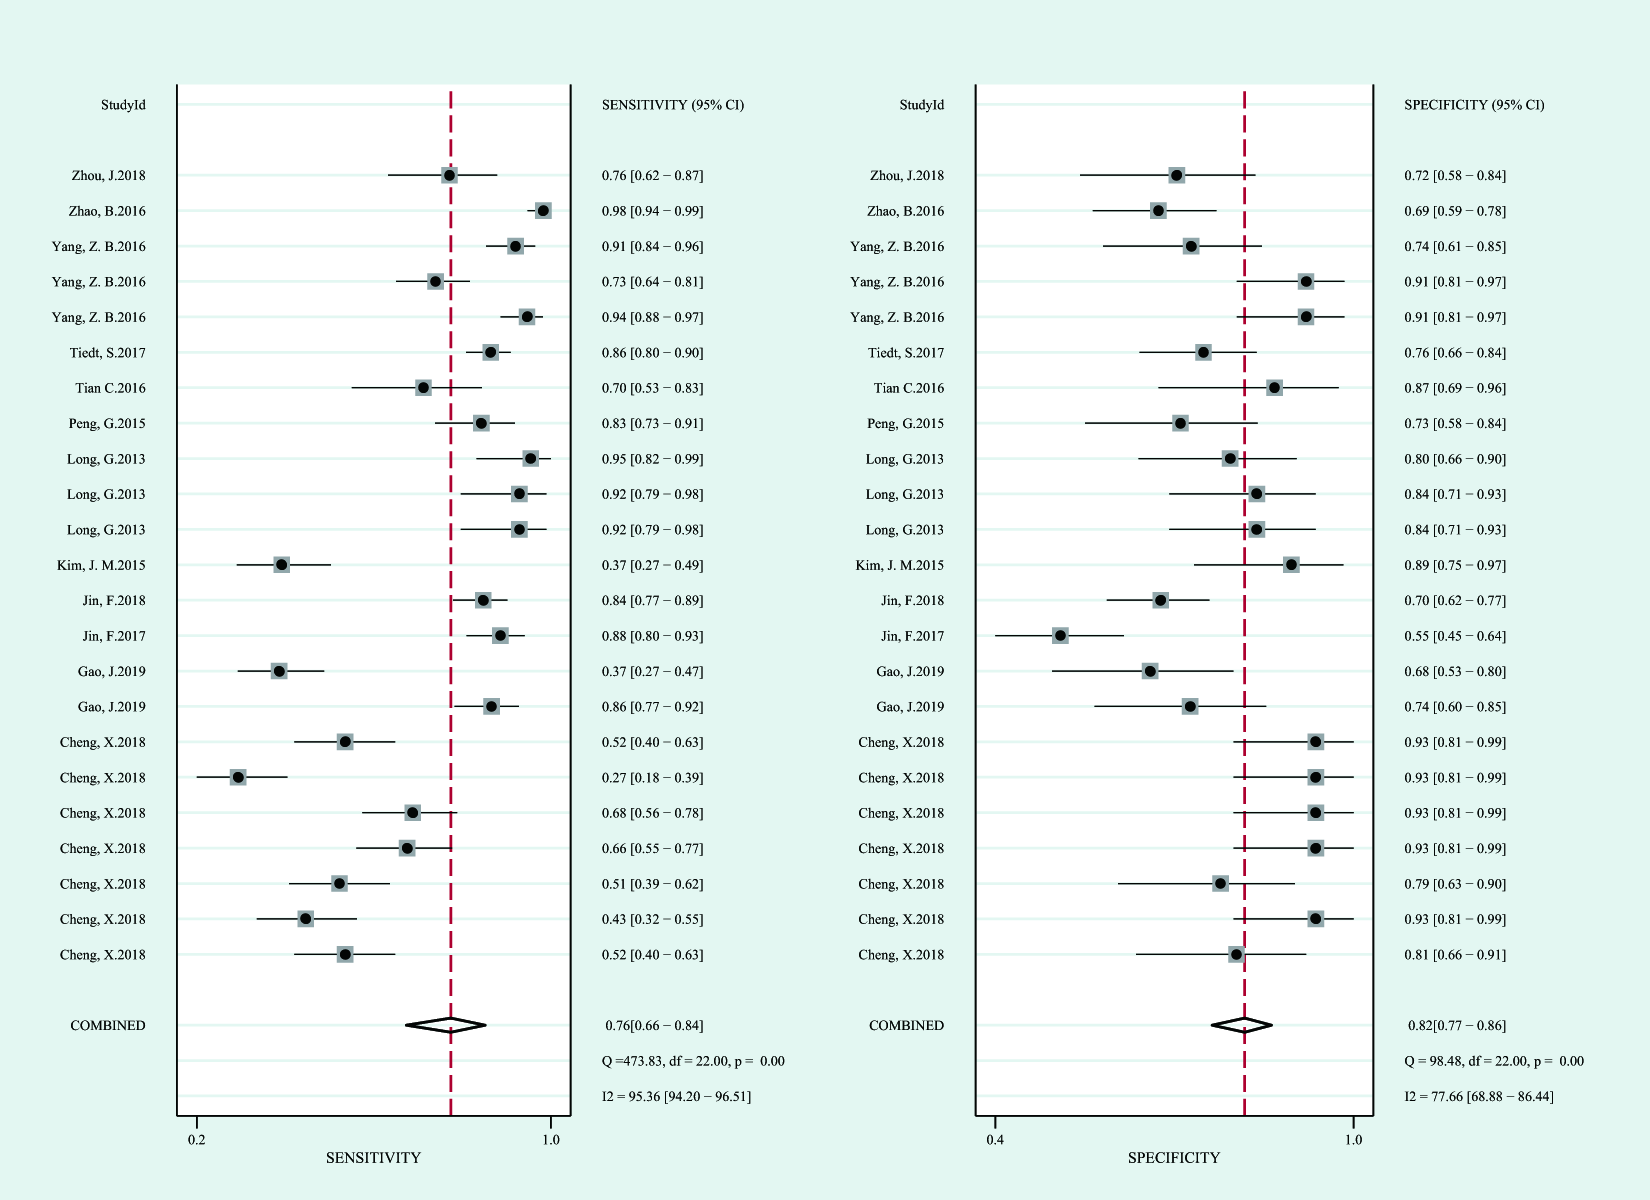


Figure S5 Forest plots after excluding the 13th、17th、19tn、25th sets of miRNAs


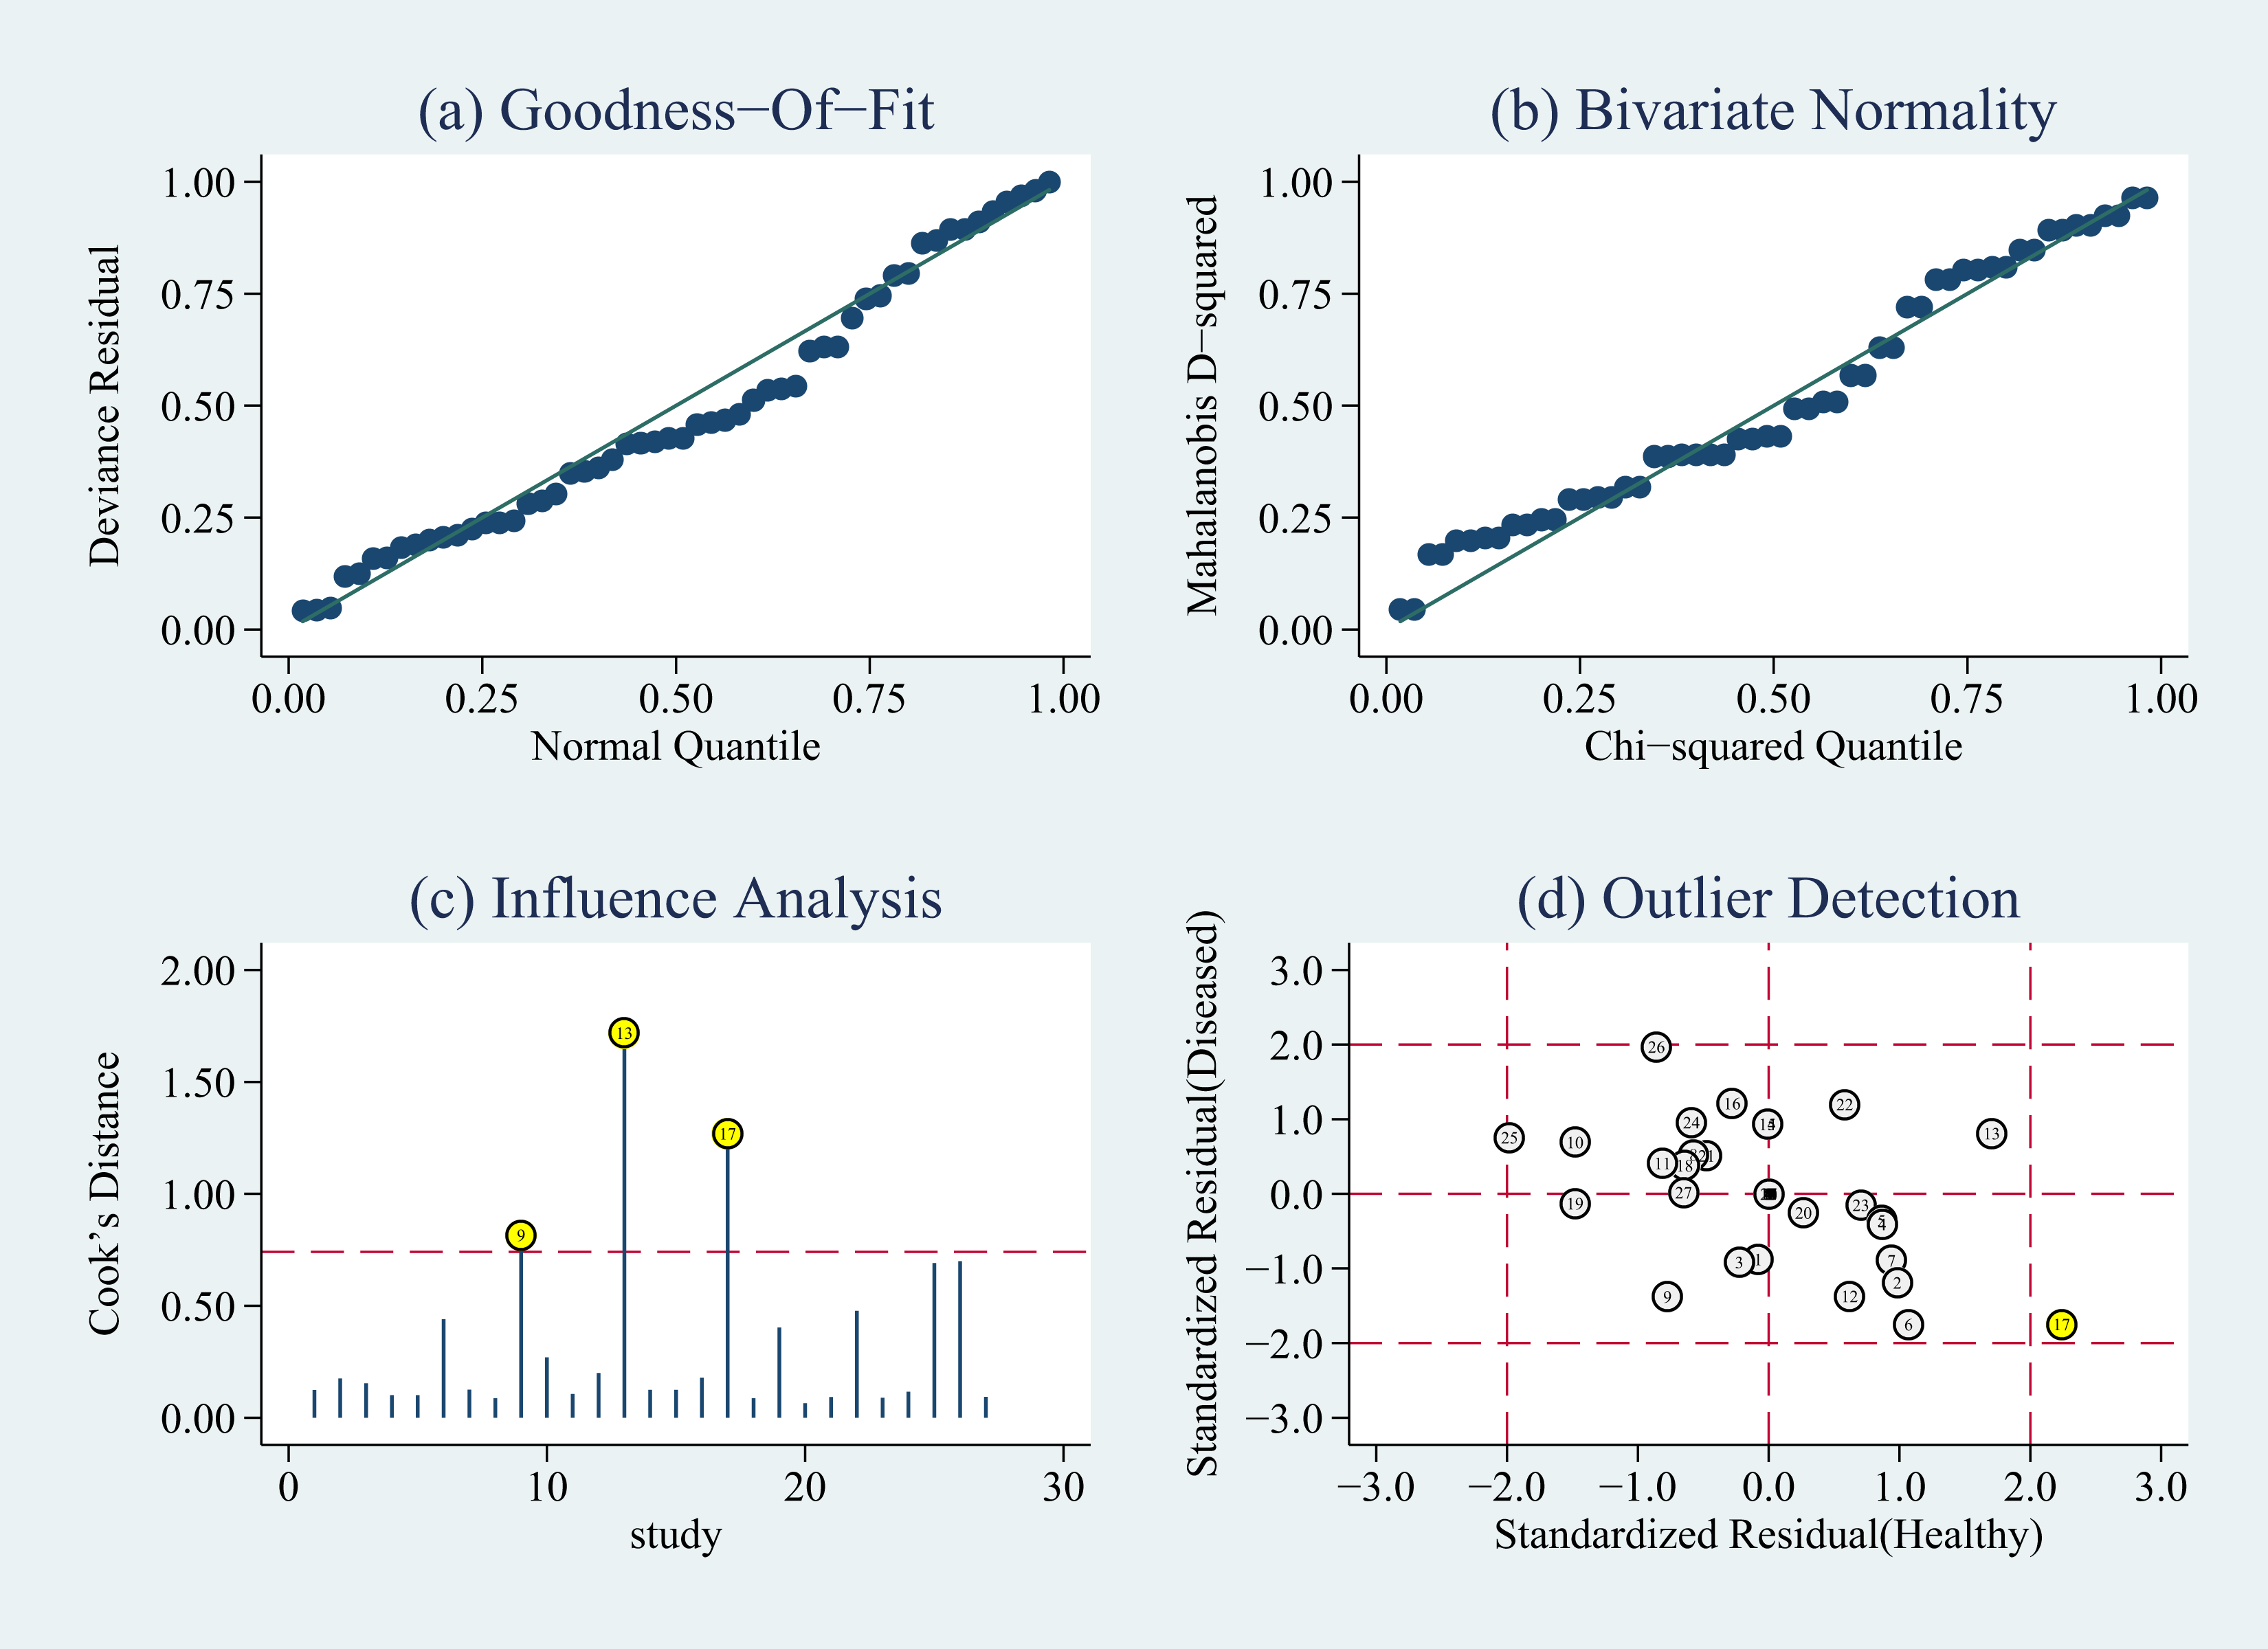


Figure S6 Diagrams of miRNAs: (a)Goodness-of-fit, (b)Bivariate normality, (c)Influence analysis, (d)Outlier ditection. Goodness-of-fit and Bivariate normality showed that random effects model is suitable. Influence analysis showed studies weight more than others, and Outlier diection is responsible for heterogeneity.


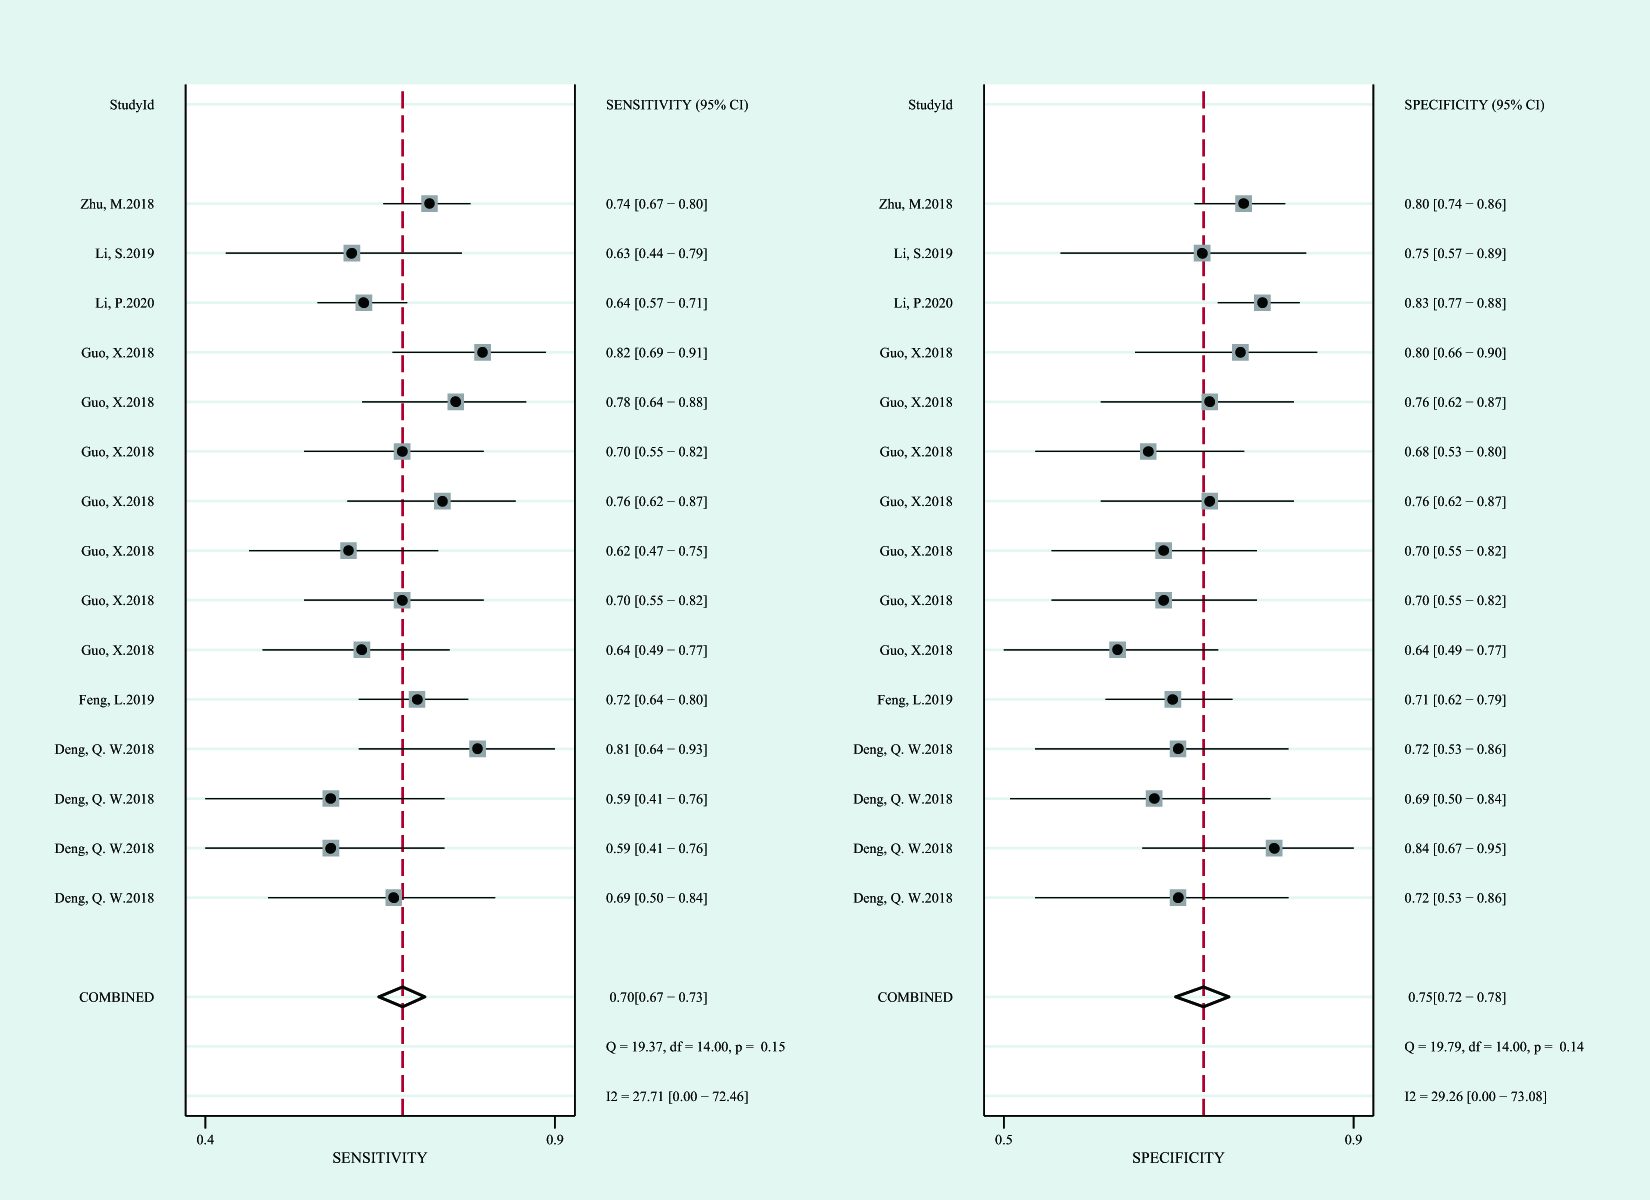


Figure S7 Forest plots after excluding the 15th、16th、17th sets of lncRNAs


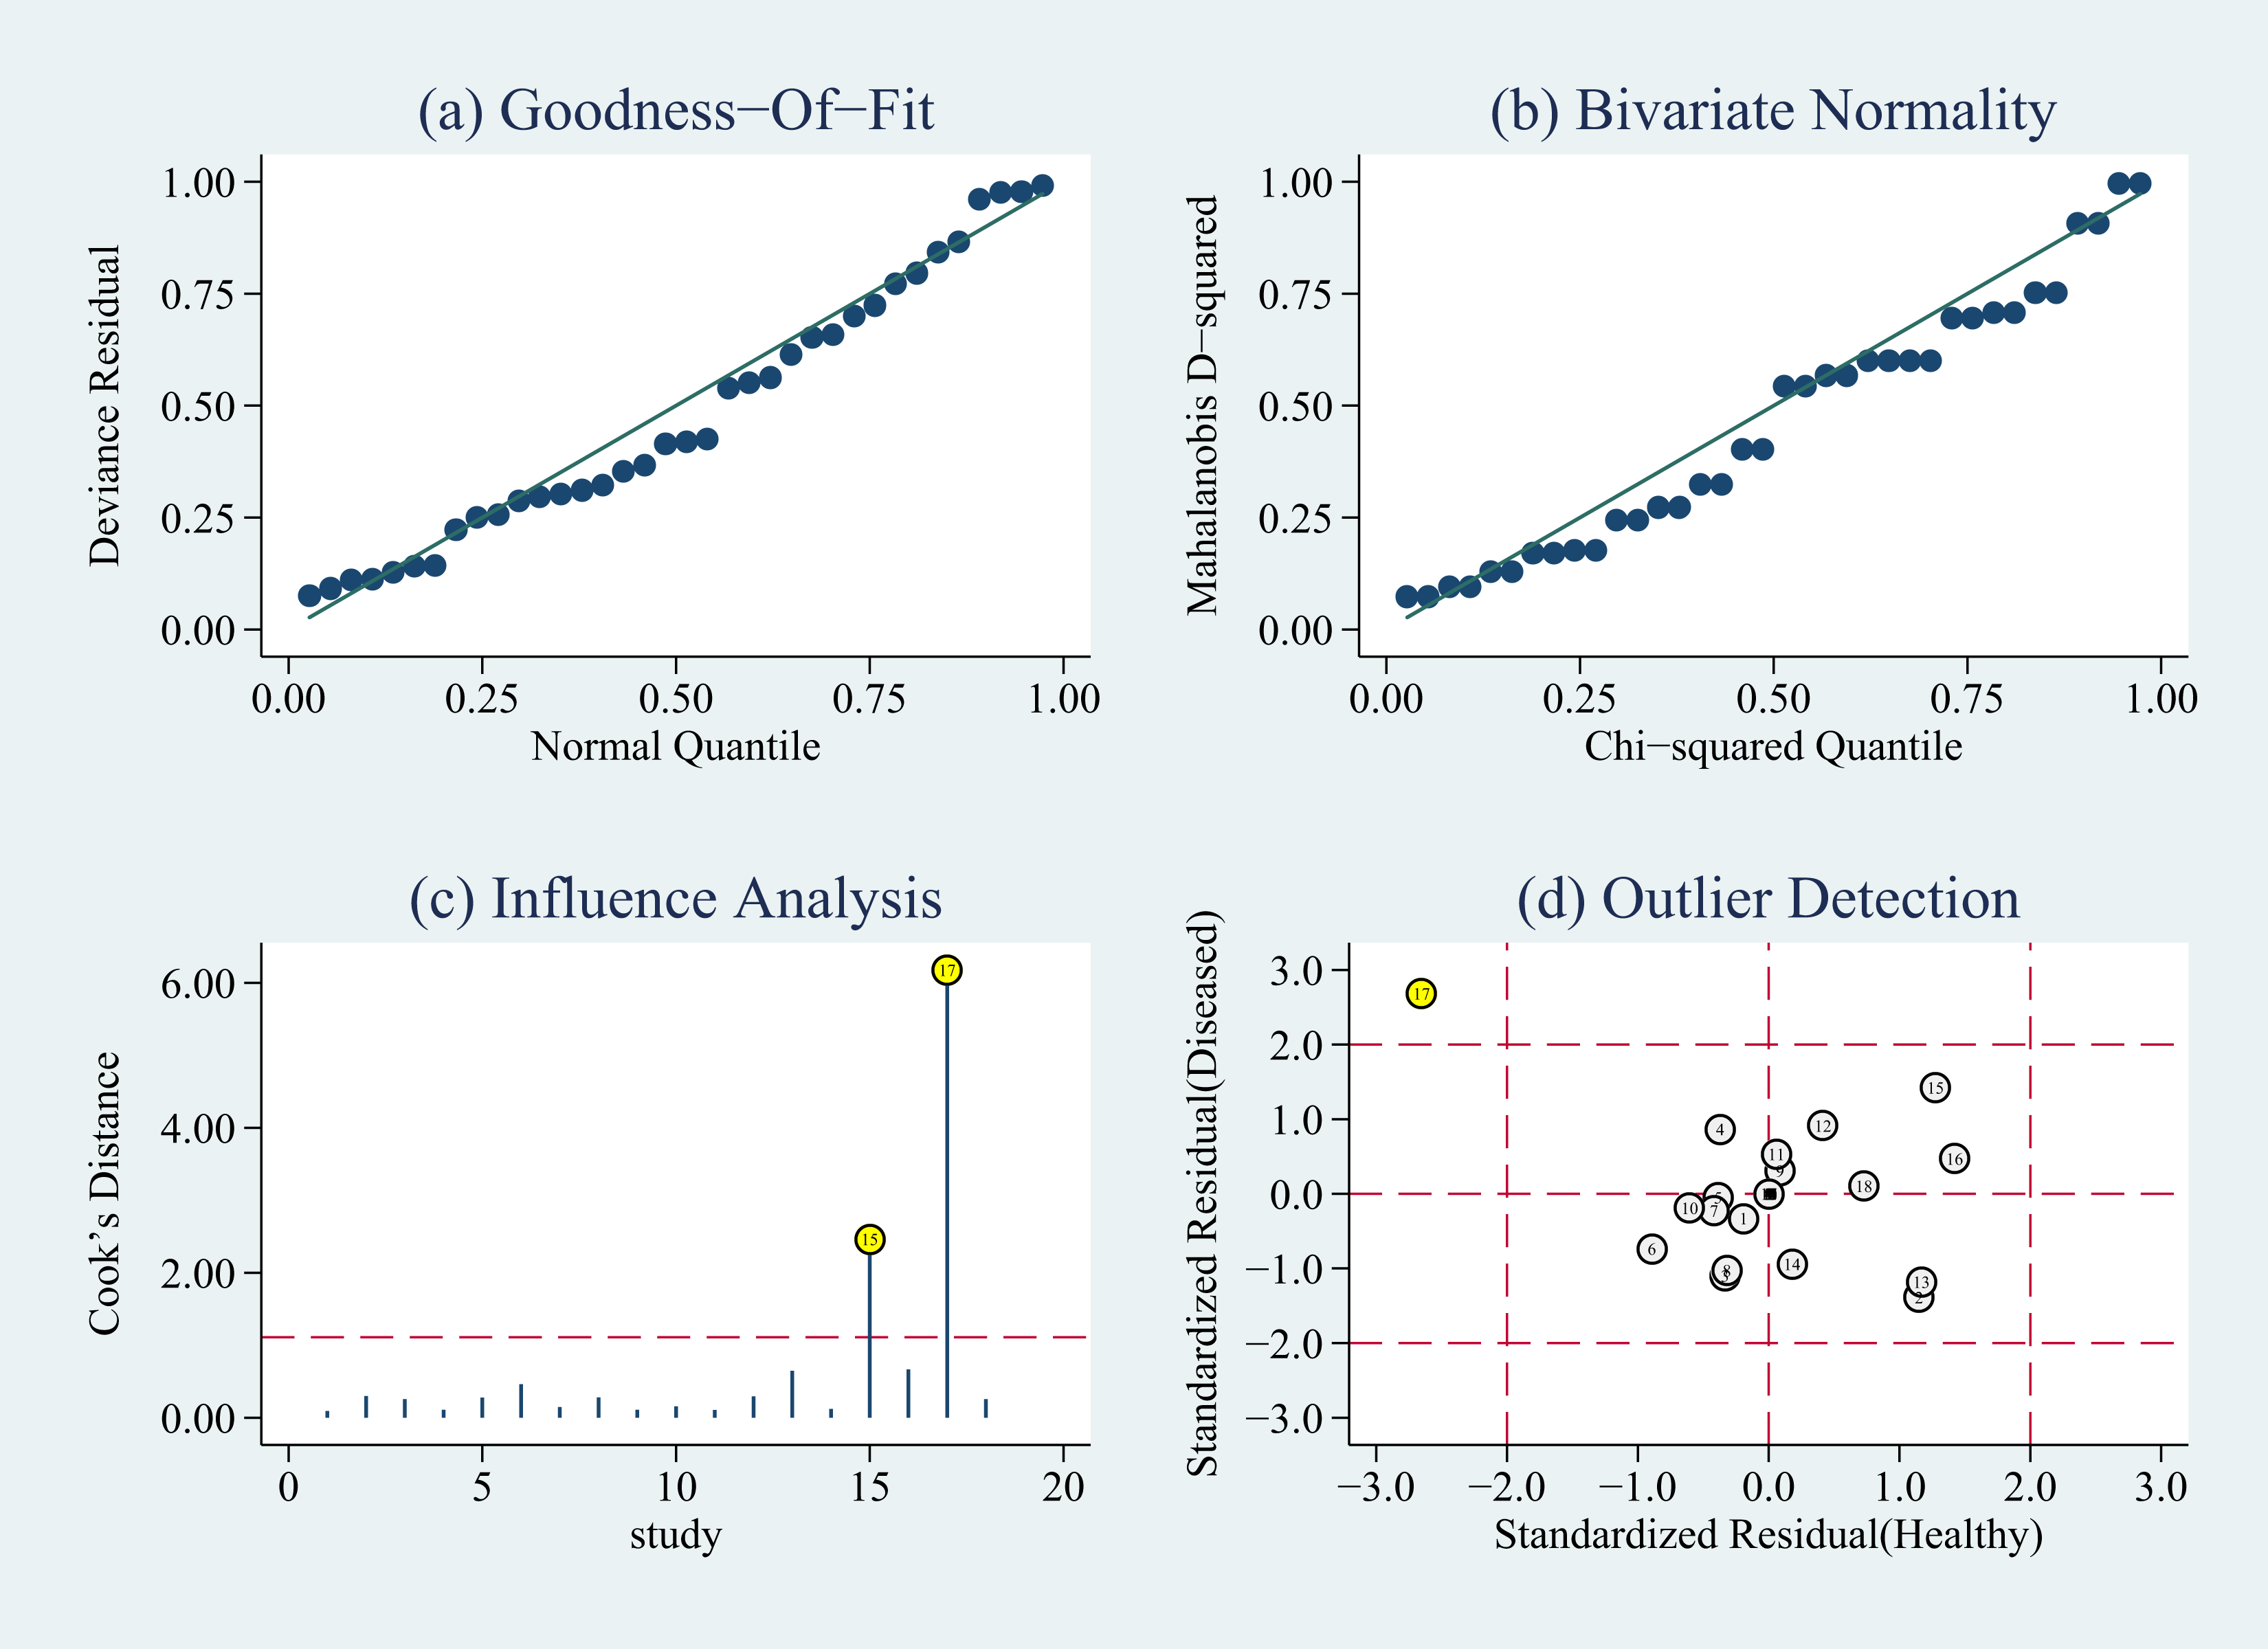


Figure S8 Diagrams of lncRNAs: (a)Goodness-of-fit, (b)Bivariate normality, (c)Influence analysis, (d)Outlier ditection.
